# Supplementary material for: Early Development of Direct Embryos in the Cultured Anthers of Manihot esculenta Crantz
Source: MDPI journal article supplement (doi:10.3390/plants9101315), 2020-10-06
Supplement: s1 [file s1]

## **S2. Thermal profile used for DNA amplification with cassava SSR primers**

| <b>Step</b>          | <b>Temperature (°C)</b> | <b>Time (minutes)</b> |
|----------------------|-------------------------|-----------------------|
| Initial denaturation | 94.00                   | 5                     |
|                      | 94.00                   | 1                     |
| Annealing            | Depending on primers    | 1                     |
| Elongation           | 72                      | 4                     |
| Extension            | 72                      | 15                    |
| Stop                 | 4                       | 2                     |
