# Supplementary material for: Early Development of Direct Embryos in the Cultured Anthers of Manihot esculenta Crantz
Source: MDPI journal article supplement (doi:10.3390/plants9101315), 2020-10-06
Supplement: s1 [file s1]

**S1.** SSR markers screened for polymorphisms in donor plant DNA in order to identify the allelic status of anther-derived embryogenic structures of *Manihot esculenta* var. *Kirikawadi*.

|    | Marker name | Sequence information 5' -3'                            | Annealing temperature (°C) |
|----|-------------|--------------------------------------------------------|----------------------------|
| 1  | SSRY2       | CGCCTACCACTGCCATAAAC<br>TGATGAAATTCAAAGCACCA           | 58.50                      |
| 2  | SSRY4       | ATAGAGCAGAAGTGCAGGCG<br>CTAACGCACACGACTACGGA           | 62.00                      |
| 3  | SSRY8       | AGTGGTTTGAGAAGACTGGTGA<br>TTTCCAAAATGGAACCTTCAAA       | 57.40                      |
| 4  | SSRY17      | CTTAGAAAAGAAATTGCATGTGAG<br>TGTCTGATCAAGCTGGTGACA      | 58.50                      |
| 5  | SSRY20      | CATTGGACTTCCTACAAATATGAAT<br>TGATGGAAAGTGGTTATGTCCTT   | 57.80                      |
| 6  | SSRY37      | ATGGCAAAAGATCGAGCAAC<br>GGCCAGTAATTCCTCAAGGC           | 60.00                      |
| 7  | SSRY53      | CCATGCAGTAGTGCCATCTTT<br>ATTTTCACCAACCGCAACTC          | 59.60                      |
| 8  | SSRY64      | CGACAAGTCGTATATGTAGTATTCACG<br>GCAGAGGTGGCTAACGAGAC    | 61.35                      |
| 9  | SSRY69      | CGATCTCAGTCGATACCCAAG<br>CACTCCGTTGCAGGCATTA           | 60.00                      |
| 10 | SSRY73      | AAGTTGATGGTTCTGAATCTGGA<br>ACAGTGATTGAGCGAGGCTT        | 60.50                      |
| 11 | SSRY81      | GGCGATTTTCATGTCATGCTT<br>TGATTTTCTGCGTGATGAGC          | 58.50                      |
| 12 | SSRY87      | CTCATCTCATGAAGAACTTGTGC<br>AGAGCACGCATTGTGCATT         | 60.00                      |
| 13 | SSRY94      | AGGATGGACTTGGAGATGGA<br>GGTGGAAGTAAGGCTGTTAGTG         | 60.50                      |
| 14 | SSRY107     | CCATTTTCTCTTGCTTCTGTCA<br>TGGTTTGAAGTCCTATAAAATCCTT    | 57.80                      |
| 15 | SSRY110     | TTGAGTGGTGAATGCGAAAG<br>AGTGCCACCTTGAAAGAGCA           | 60.00                      |
| 16 | SSRY114     | AACAGGAAGGAAAATCAAGCC<br>TCAACTGCAGATTCATTCAAGA        | 57.80                      |
| 17 | SSRY128     | CAGGACATGACGCAATTCTG<br>GCATGTAGAAGTCTTTGCAATTATG      | 58.50                      |
| 18 | SSRY162     | TTTAGTTAGTTGCGCTAGCTTCC<br>AACTCTTAATGGCTAAAATTATTGATG | 57.80                      |
